# Supplementary material for: Identification of immune-related LncRNA for predicting prognosis and immunotherapeutic response in bladder cancer
Source: publisher site journal article supplement (doi:10.18632/aging.104115), 2020-11-18
Supplement: Supplementary file [file aging-v12i22-104115-supplementary-material-SD1.pdf]

SUPPLEMENTARY FIGURES

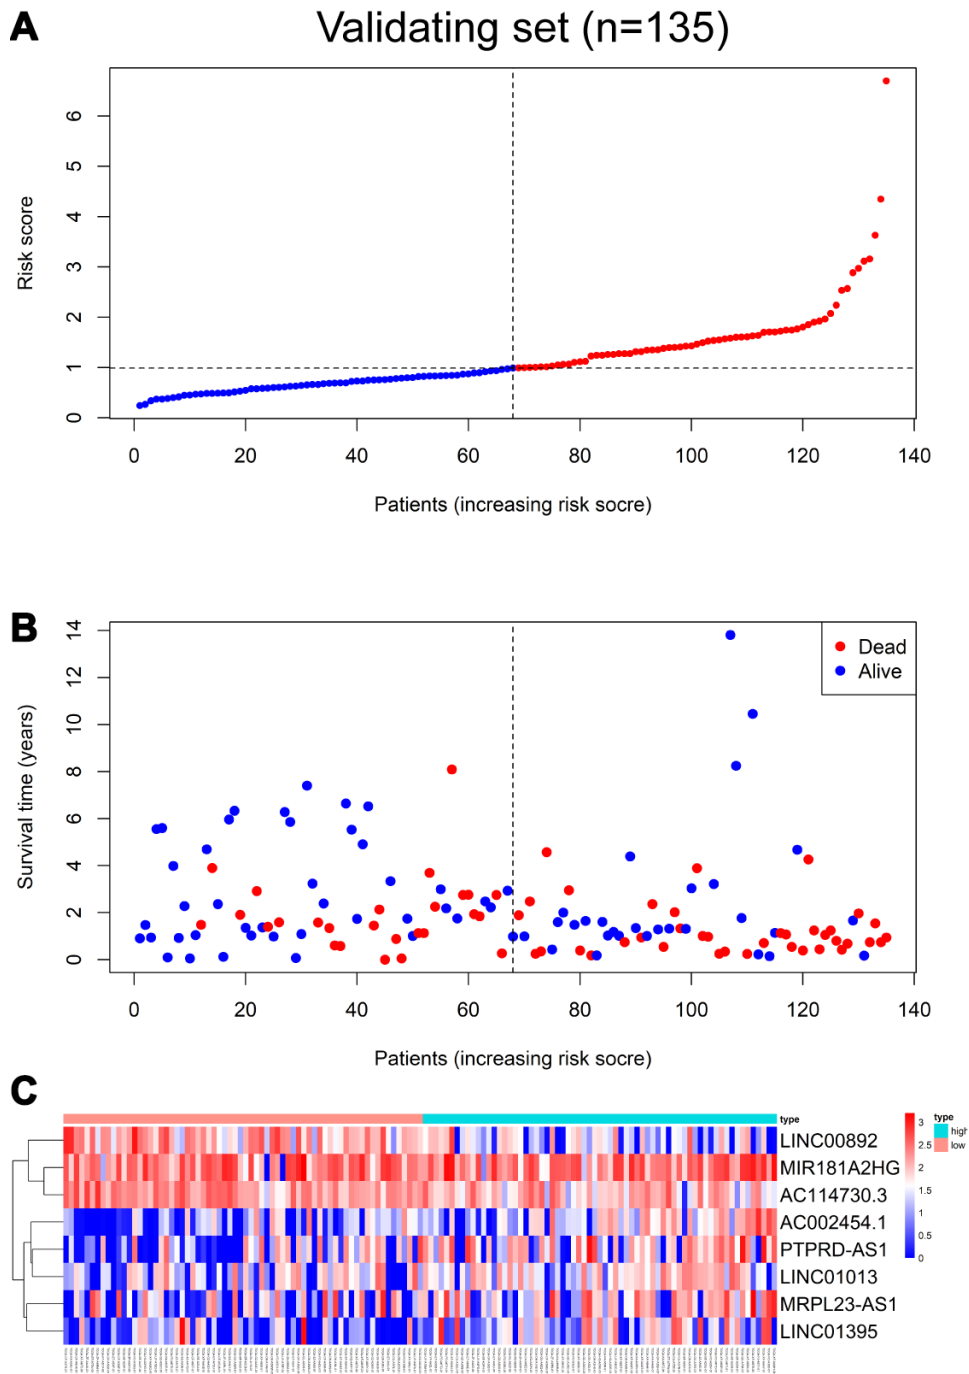

**Supplementary Figure 1.** Construction of the 8-IRlncRNA classifier for predicting prognosis in BLCA (A) Patients with BLCA were sorted by increasing risk score in the validating set. (B) Living status of BLCA patients in the validating set. (C) Heatmap of eight IRlncRNAs expression profiles of different risk groups in the validating set.

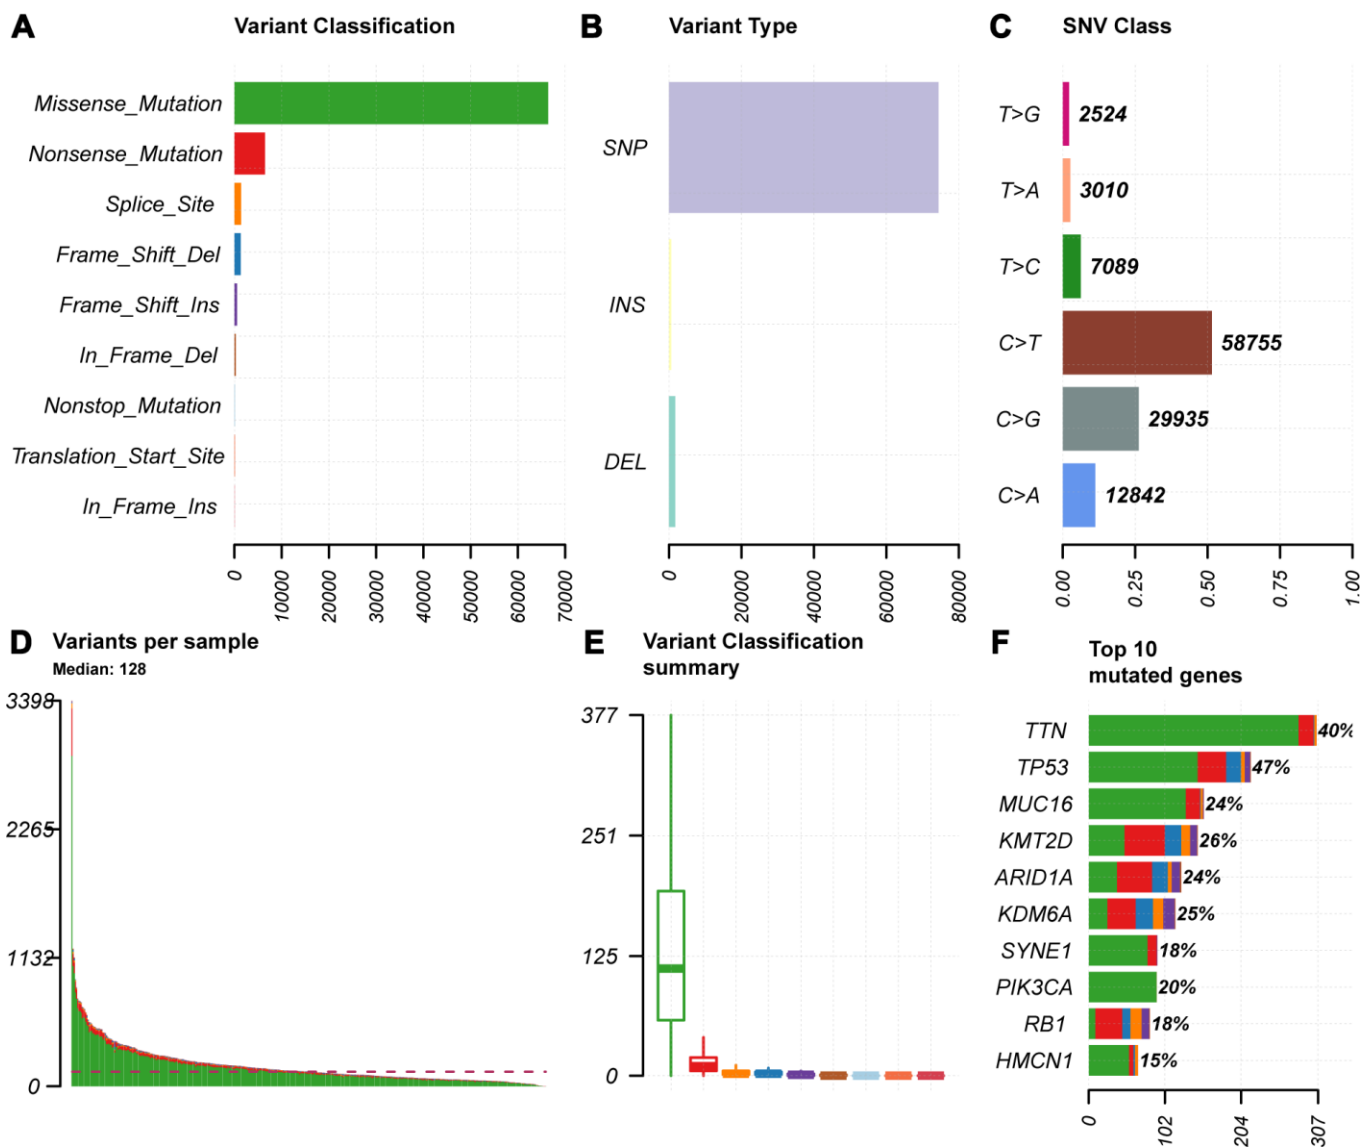

**Supplementary Figure 2. Summary of mutation profiling in BLCA samples.** (A–C) Statistical calculation of mutation types based on different categories, where missense mutation occupies the most component, SNP exhibited more frequent than the deletion or insertion, and C > T was the most common class of single nucleotide variation (SNV). (D, E) Summary of variant number and classification in specific samples. (F) The top 10 mutated genes in BLCA.
