# Supplementary material for: Identification of immune-related LncRNA for predicting prognosis and immunotherapeutic response in bladder cancer
Source: publisher site journal article supplement (doi:10.18632/aging.104115), 2020-11-18
Supplement: Supplementary file [file aging-v12i22-104115-supplementary-material-SD2.pdf]

## SUPPLEMENTARY TABLE

**Supplementary Table 1. Univariate and multivariate Cox regression analysis of the 8-IRlncRNA classifier with RFS in TCGA-BLCA database.**

| Features                                          | Univariate COX      |                  | Multivariate COX   |                  |
|---------------------------------------------------|---------------------|------------------|--------------------|------------------|
|                                                   | HR (95% CI)         | P                | HR (95% CI)        | P                |
| Age (>70 vs≤70)                                   | 1.068(0.787,1.449)  | 0.672            |                    |                  |
| Gender<br>(Male vs Female)                        | 0.914(0.652,1.282)  | 0.603            |                    |                  |
| Pathological stage<br>(III+IV vs I+II)            | 2.177(1.512,3.136)  | <b>&lt;0.001</b> | 1.968(1.357,2.854) | <b>&lt;0.001</b> |
| Histologic grade<br>(High vs Low)                 | 3.526(0.873,14.243) | 0.077            |                    |                  |
| Diagnosis subtype<br>(Papillary vs Non-Papillary) | 0.635(0.442,0.913)  | <b>0.014</b>     |                    |                  |
| 8-IRlncRNA classifier (High<br>risk vs Low risk)  | 2.154(1.582,2.932)  | <b>&lt;0.001</b> | 2.052(1.497,2.813) | <b>&lt;0.001</b> |

Abbreviations: RFS, Recurrence free survival; TCGA, The Cancer Genome Atlas; BLCA, Bladder cancer; HR, Hazard ratio; CI, Confidence interval.
